## IN THIS ISSUE

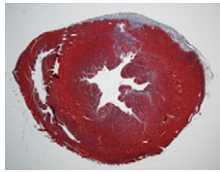

### Broken-hearted over Hippo

Mammalian cardiac regeneration is greatly impeded by the massive loss of cardiomyocytes that occurs following acute injury. The failure of the remaining cells to proliferate is a considerable challenge for the field, but the molecular mechanisms that control cardiomyocyte proliferation in the adult heart are largely unknown. Now, on p. 4683, James Martin and colleagues demonstrate a role for Hippo signalling in suppressing adult and postnatal murine cardiomyocyte proliferation. Using conditional knockouts, the authors show that removal of Hippo pathway members *Salv* or *Lats1* and *Lats2* from normal adult cardiomyocytes results in increased proliferation, as these cells are able to re-enter the cell cycle and undergo cytokinesis. Moreover, removal of *Salv* from cardiomyocytes *in vivo* results in improved cardiac regeneration after adult myocardial infarction, a time when regeneration is usually severely impaired. Here, the authors observed reduced scarring and full restoration of cardiac function. This elegant study suggests that Hippo signalling is a repressor of adult cardiomyocyte renewal and regeneration.

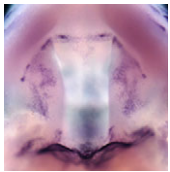

### Osr2 PAX a punch in palate formation

Precise orchestration of palate formation involves the complex interaction of signalling cascades and transcriptional networks in the developing craniofacial region. *Pax9* and *Osr2* have previously been implicated in palate formation, but little is known about how these molecular components interact within the greater regulatory network. Now, on p. 4709, Rulang Jiang and colleagues report a crucial role for *Pax9* in patterning the anterior-posterior axis as well as outgrowth of the developing palatal shelves. The authors show that *Pax9* regulates mesenchyme-epithelium interactions during pattern formation and that the expression of several key genes involved in palate development, such as *Shh*, *Bmp4*, *Fgf10*, *Msx1* and *Osr2*, is reduced in *Pax9* mutant mice. Interestingly, expression of *Osr2* from the *Pax9* locus was able to rescue the posterior, but not anterior, palate formation defect in the absence of *Pax9* function. These data place *Pax9* upstream of transcription factor *Osr2* and signalling molecules *Bmp4*, *Fgf10* and *Shh* in the molecular network that regulates palate development.

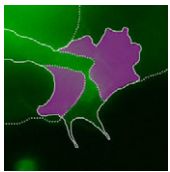

### Par3 makes contact in migrating mesenchyme

Contact inhibition of locomotion (CIL) is a fundamental regulatory mechanism that ensures correct cell movement and migration. During CIL, cells form transient contacts but the molecular nature of such contacts is unknown. In this issue, Roberto Mayor and colleagues (p. 4763) investigate the role of the cell polarity protein *Par3* in microtubule collapse and reorganisation during CIL in migrating neural crest cells. Using antisense morpholinos to *Par3* in *Xenopus* and zebrafish, the authors show that loss of *Par3* has a dramatic effect on migration and is essential for CIL both *in vitro* and *in vivo*. *Par3* knockdowns fail to exhibit microtubule collapse at the cell-cell contact; however, this can be rescued by injection of an antisense morpholino to *Trio*, implicating the Rac-GEF *Trio* in migrating neural crest CIL. The authors propose a model in which CIL requires the local destabilisation of microtubules at the cell-cell contacts, which is controlled in a *Par3/Trio*-dependent manner.

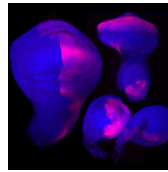

### Designer flies: accelerated genome editing in Drosophila

The immense power of *Drosophila* genetics has allowed invaluable insight into developmental biology. Despite these advances, a significant limitation has always been the lack of an efficient method for modifying select genetic loci. Now, on p. 4818, Jean-Paul Vincent and colleagues report high-efficiency homologous recombination in *Drosophila* with a novel gene-targeting vector. This can be achieved via a two-generation crossing scheme or via direct embryo injection. Importantly, both approaches yield few false-positives due to efficient negative selection, while readily detectable markers aid in the rapid identification of correctly targeted flies. The efficiency can be further increased by co-injecting the sequence-specific endonuclease CRISPR/Cas9. The investigators also report a series of vectors that can be used to insert different genetic elements into the targeted loci, such as mutated or tagged cDNAs and additional reporter genes. Their approach will enable genetic modification in a wide range of contexts, including in postmitotic cells. These tools will be a valuable resource for the *Drosophila* community.

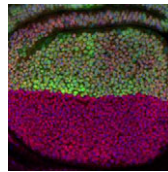

### Puffeye regulates Myc-mediated cell growth

Proper control of cell size is vital to ensure the correct growth and development of any organism. The Myc family of proteins are key regulators of growth, but the mechanisms that control Myc protein levels are complex. Now, on p. 4776, Robert Eisenman and colleagues identify *Drosophila* Puffeye (*Puf*), an orthologue of mammalian USP34, as a novel ubiquitin-specific protease (USP) regulating dMyc-dependant cell growth at the post-translational level. Using genetic interaction experiments, the authors demonstrate that *puf* opposes the activity of the ubiquitin ligase *archipelago* (*ago*) and that *Puf* acts to stabilise dMyc protein levels. Overexpression of *puf* in the eye and wing phenocopies *dMyc* overexpression, while expression of a catalytically inactive form of *Puf* had no effect, demonstrating the requirement of the *Puf* USP catalytic domain. Interestingly, the authors demonstrated that *Puf* can also regulate *Ago* and *Cyclin E* protein levels. These data reveal a new mechanism by which dMyc levels can be regulated by USPs in order to fine-tune cell growth.

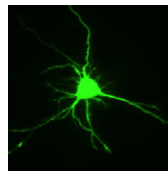

### GDF5 determines dendrite growth

Dendrite complexity determines the functional properties of neurons and the overall connectivity of neuronal circuits. The bone morphogenetic protein (BMP) family is known to regulate a myriad of developmental processes, but the extent to which different members of the family are involved in dendrite growth remains unclear. In this issue (p. 4751), Alun Davies and colleagues identify growth differentiation factor 5 (GDF5), a member of the BMP family, as a key regulator of dendrite growth and complexity in the pyramidal neurons of the developing hippocampus. Mice harbouring a mutation in *Gdf5* showed dramatically reduced dendrite size and complexity. *In vitro*, exogenous GDF5 treatment was sufficient to increase elongation of the dendrites, but not the axons, of pyramidal cells derived from the developing mouse hippocampus. The authors further demonstrated that GDF5-mediated dendrite growth acts via the Smad signalling pathway and that GDF5-regulated HES5 expression is both necessary and sufficient for enhanced dendritic growth and complexity.
